# Supplementary material for: Beneficial Effects of Small Molecule Oligopeptides Isolated from Panax ginseng Meyer on Pancreatic Beta-Cell Dysfunction and Death in Diabetic Rats
Source: MDPI journal article supplement (doi:10.3390/nu9101061), 2017-09-26
Supplement: s1 [file s1]

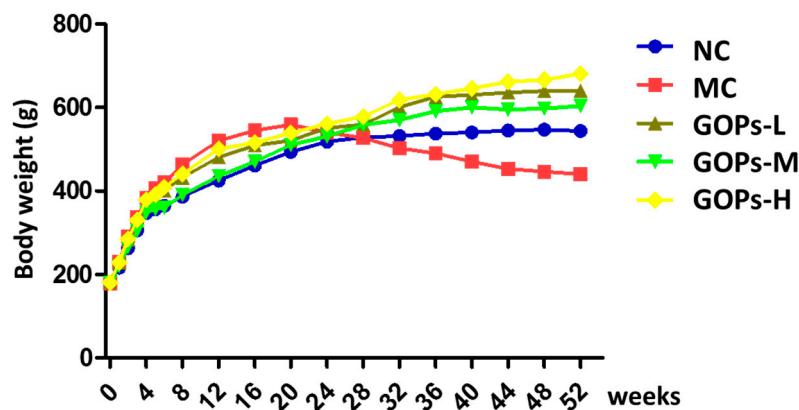

**Figure S1.** Growth curve for Sprague-Dawley rats treated with GOPs for 52 weeks. 15 rats/group were used in each group. The data were analyzed for significance of differences by one-way analysis of variance test. <sup>a</sup>  $p < 0.05$  versus NC rats, <sup>b</sup>  $p < 0.05$  versus MC rats. GOPs: *Panax ginseng* oligopeptide. NC, normal control group; MC, model control group; GOPs-L, low dose of GOPs-treated group; GOPs-M, medium dose of GOPs-treated group; GOPs-H, high dose of GOPs-treated group.

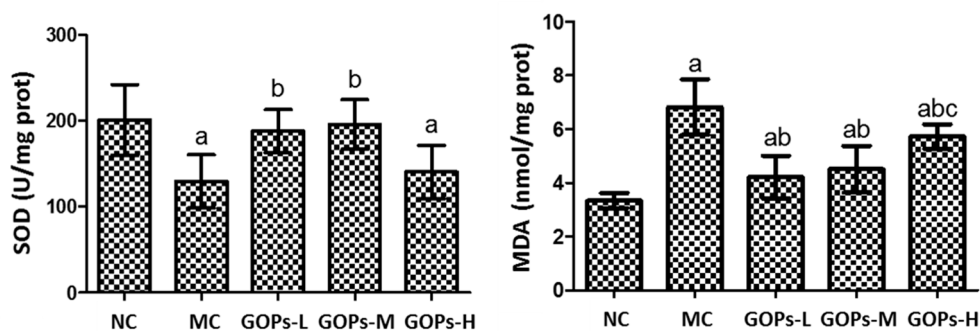

**Figure S2.** The serum activities of SOD and MDA level in Sprague-Dawley rats treated with GOPs for week 7. 8 rats/group (at week 7) were used in each group. The data were analyzed for significance of differences by one-way analysis of variance test. <sup>a</sup>  $p < 0.05$  versus NC rats, <sup>b</sup>  $p < 0.05$  versus MC rats. GOPs: *Panax ginseng* oligopeptide; MDA: malondialdehyde; SOD: superoxide dismutase. NC, normal control group; MC, model control group; GOPs-L, low dose of GOPs-treated group; GOPs-M, medium dose of GOPs-treated group; GOPs-H, high dose of GOPs-treated group.
